# Supplementary material
Source: HighWire-hosted journal article supplement (https://jnm.snmjournals.org/highwire/filestream/95451/field_highwire_adjunct_files/0/220350_Supplemental_Data.pdf)
Supplement: 220350_Supplemental_Data.pdf [file 220350_Supplemental_Data.pdf]

**Supplemental Table 1. Number of DOTA per  $\alpha$ CD11b antibody on DOTA- $\alpha$ CD11b conjugate**

|                                   |                  |
|-----------------------------------|------------------|
| DOTA/ $\alpha$ CD11b ratio        | 50:1             |
| Number of DOTA per $\alpha$ CD11b | 5.77 $\pm$ 0.394 |

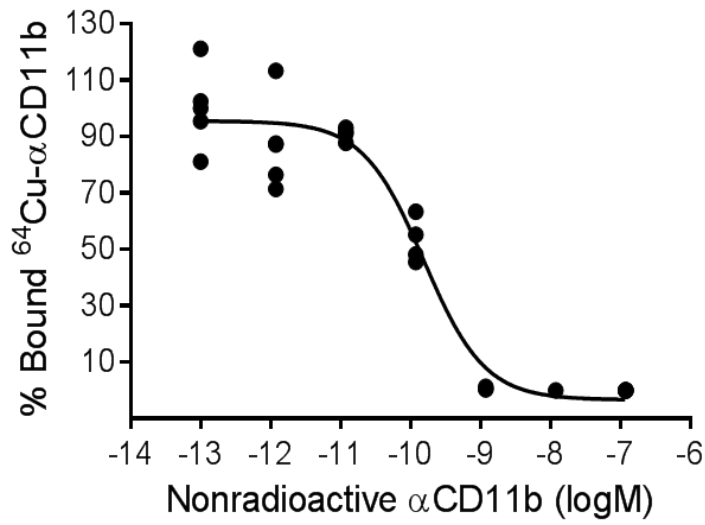

**Supplemental Figure 1. Cell binding assay.** Displacement of the binding of <sup>64</sup>Cu-αCD11b to bone marrow cells by nonradioactive αCD11b (n=5).

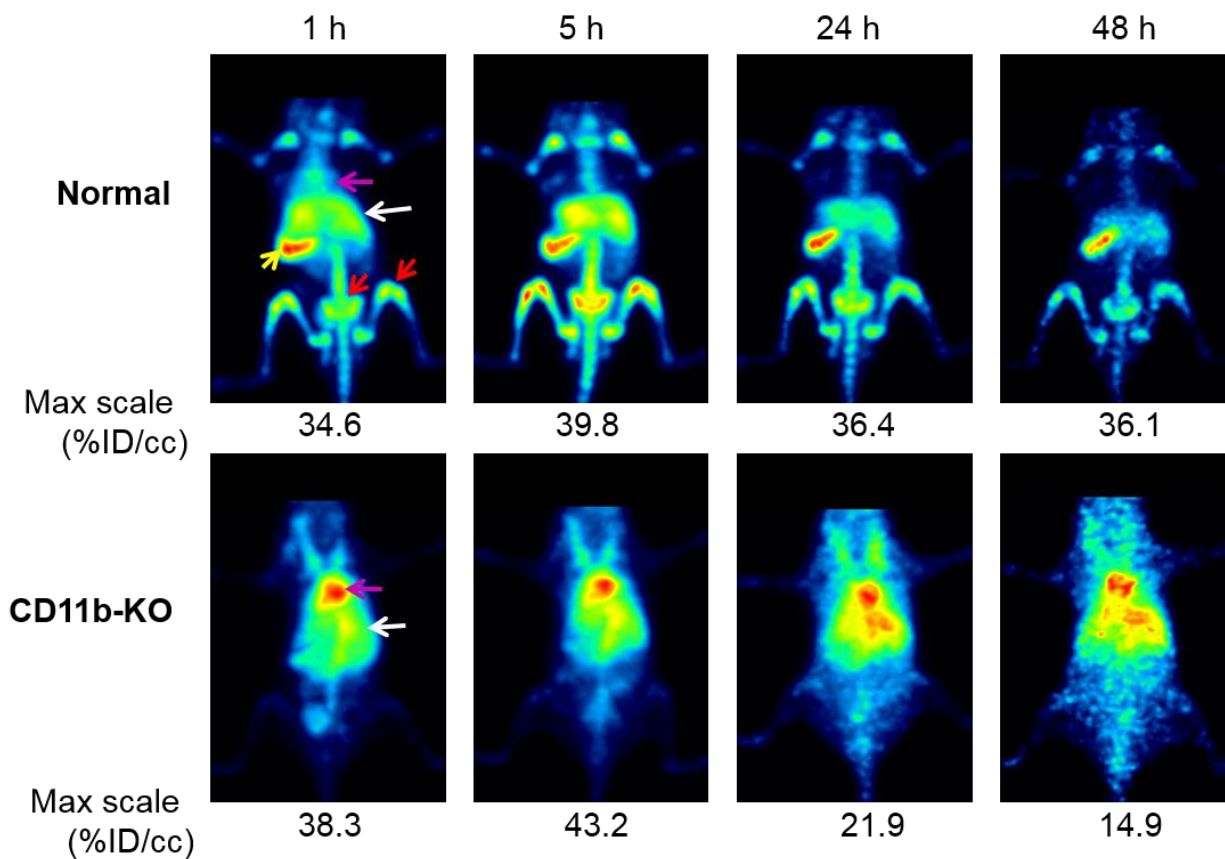

**Supplemental Figure 2. Representative 3D maximum intensity projection (MIP)  $\mu$ PET images with  $^{64}\text{Cu}$ - $\alpha\text{CD11b}$  on normal and CD11b knockout (CD11b-KO) C57BL/6 mice. Red arrows: bone marrow; yellow arrows: spleen; white arrows: liver; purple arrows: heart (n=3).**

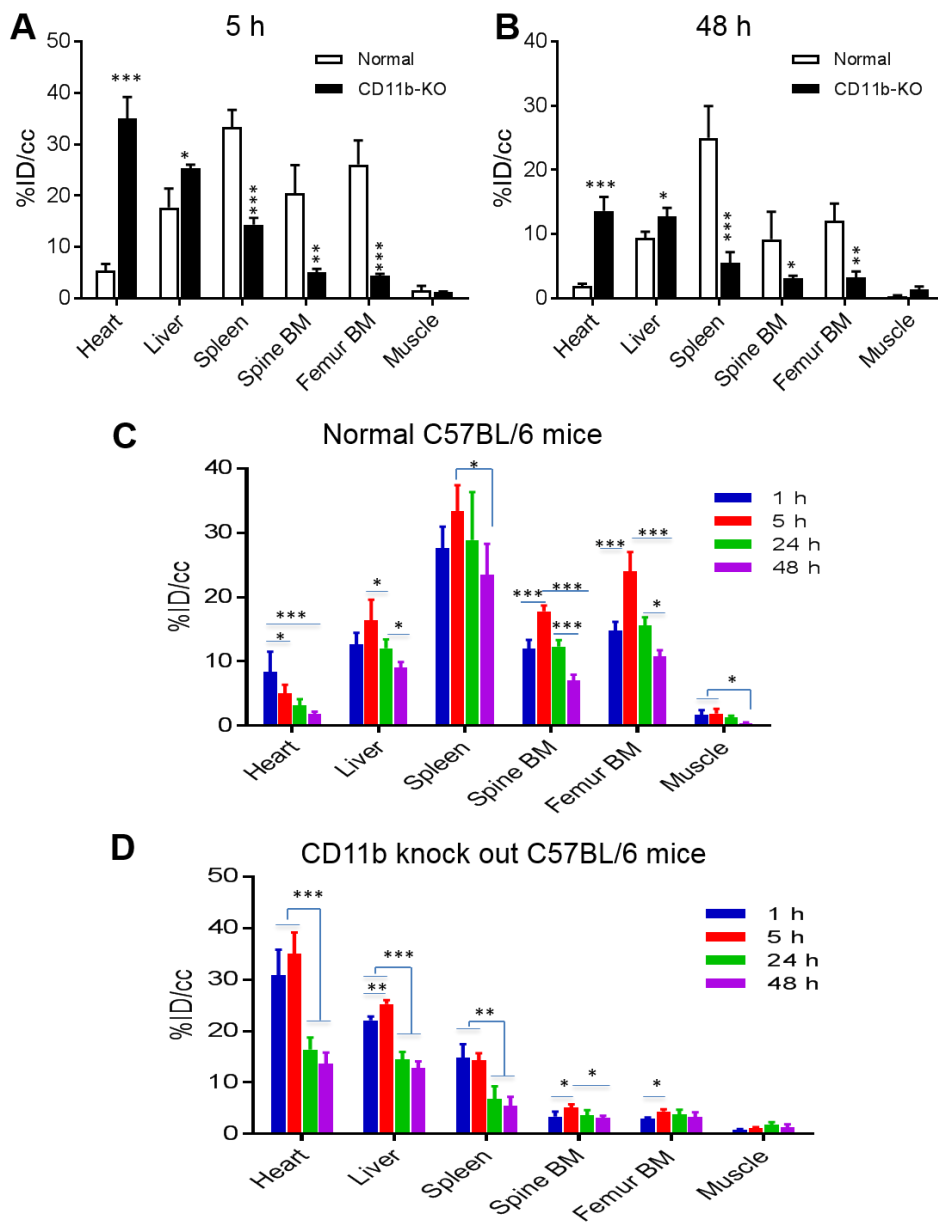

**Supplemental Figure 3. Quantitative analysis of  $\mu$ PET/CT imaging data of  $^{64}\text{Cu-}\alpha\text{CD11b}$  in normal and CD11b-KO C57BL/6 mice.** (A, B) Quantity analysis  $\mu$ PET/CT imaging data acquired at 5 h (A) or 48 h (B) after intravenous injection of  $^{64}\text{Cu-}\alpha\text{CD11b}$ . (C, D) Quantity  $\mu$ PET/CT imaging data in normal C57BL/6 mice (C) and CD11b-KO C57BL/6 mice (D) at 1, 5, 24, and 48 h after radiotracer injection. Data are expressed as mean  $\pm$  SD (n=3/group).

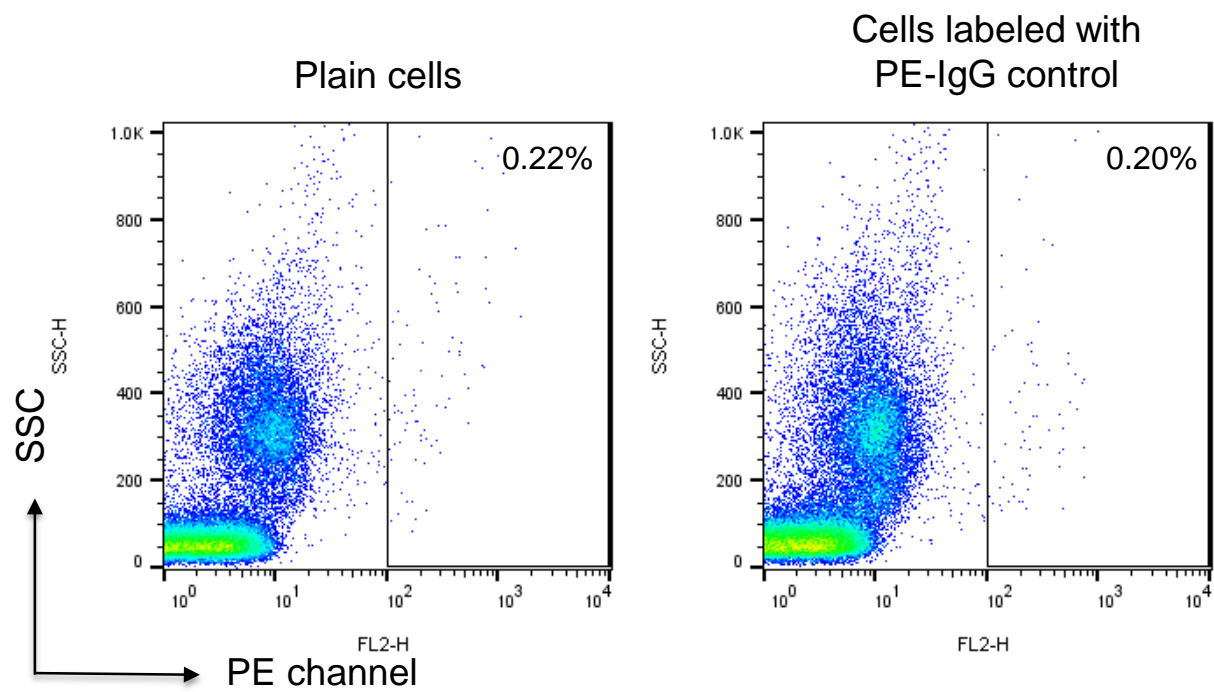

**Supplemental Figure 4.** Dot plot diagram of flow cytometry showing background signals from the PE channel for plain bone marrow cells and bone marrow cells treated with PE-IgG control.

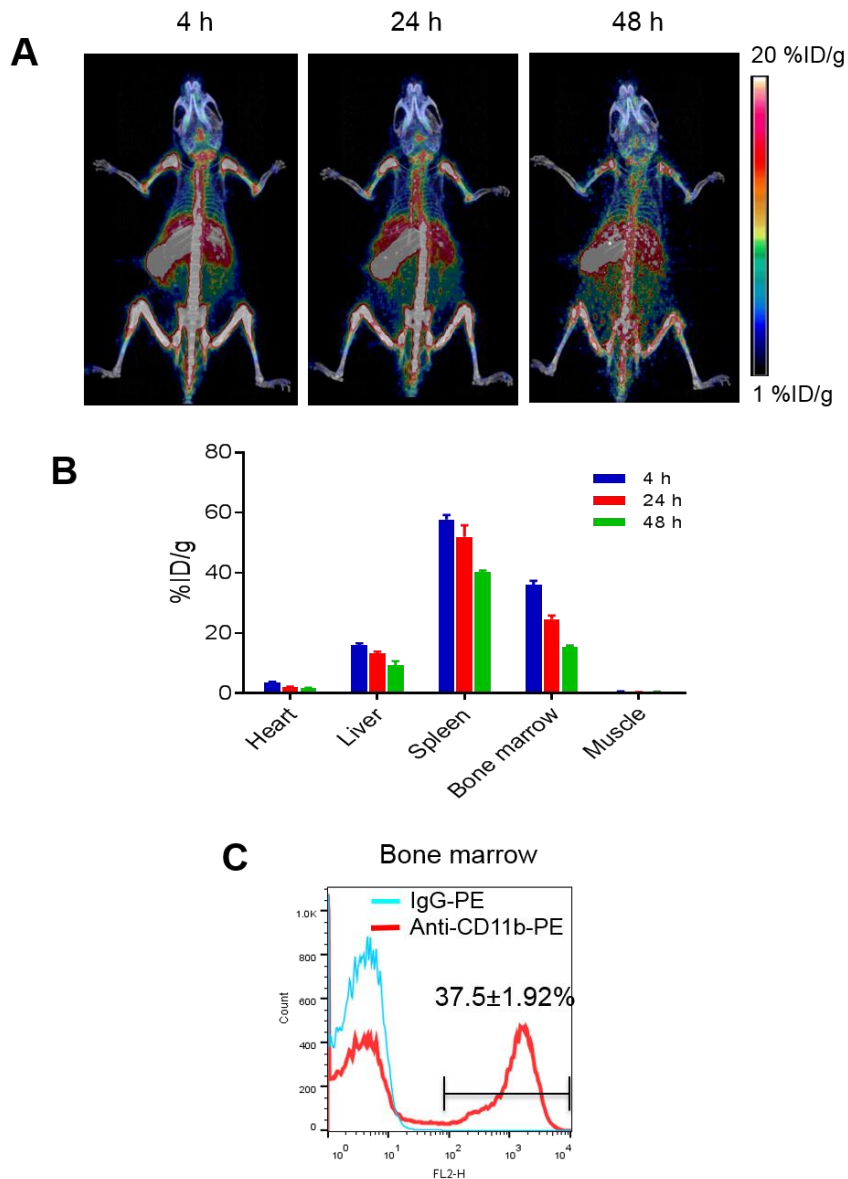

**Supplemental Figure 5.**  $^{64}\text{Cu}$ - $\alpha\text{CD11b}$   $\mu\text{PET}/\text{CT}$  in normal BALB/c mice. (A) Representative  $\mu\text{PET}/\text{CT}$  images of normal BALB/c mice at 4, 24, and 48 h after intravenous injection of  $^{64}\text{Cu}$ - $\alpha\text{CD11b}$ . (B) Quantitative analysis of  $\mu\text{PET}/\text{CT}$  data showing distribution of  $^{64}\text{Cu}$ - $\alpha\text{CD11b}$  in major organs at different times after radiotracer injection. (C) Flow cytometry analysis of  $\text{CD11b}^+$  myeloid cells in bone marrow. The resting bone marrow contains a large number of  $\text{CD11b}^+$  myeloid cells in BALB/c mice. Data were expressed as mean  $\pm$  SD (n=3).

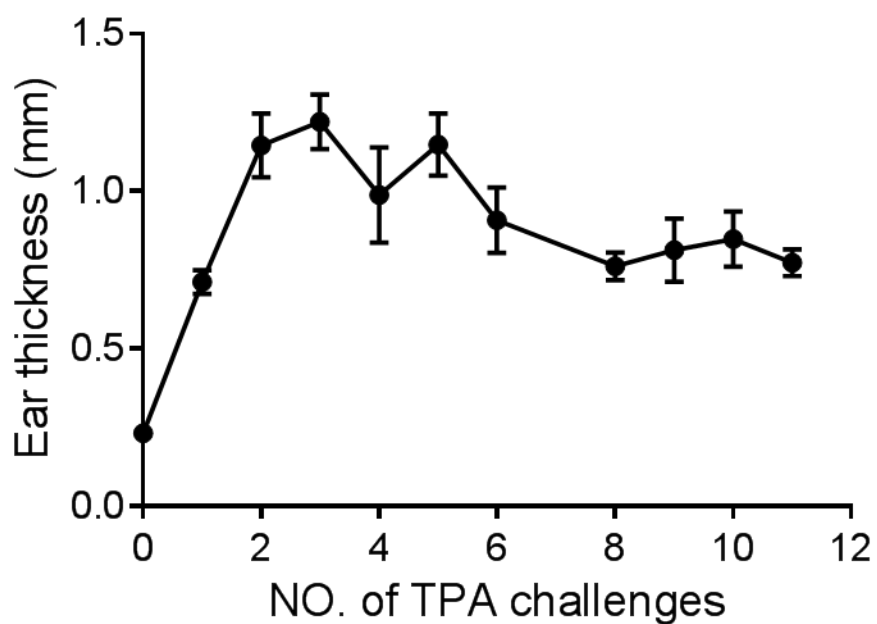

**Supplemental Figure 6.** Ear thickness after different numbers of TPA challenges on ear of BALB/c mice. Data are expressed as mean  $\pm$  SD (n=8).

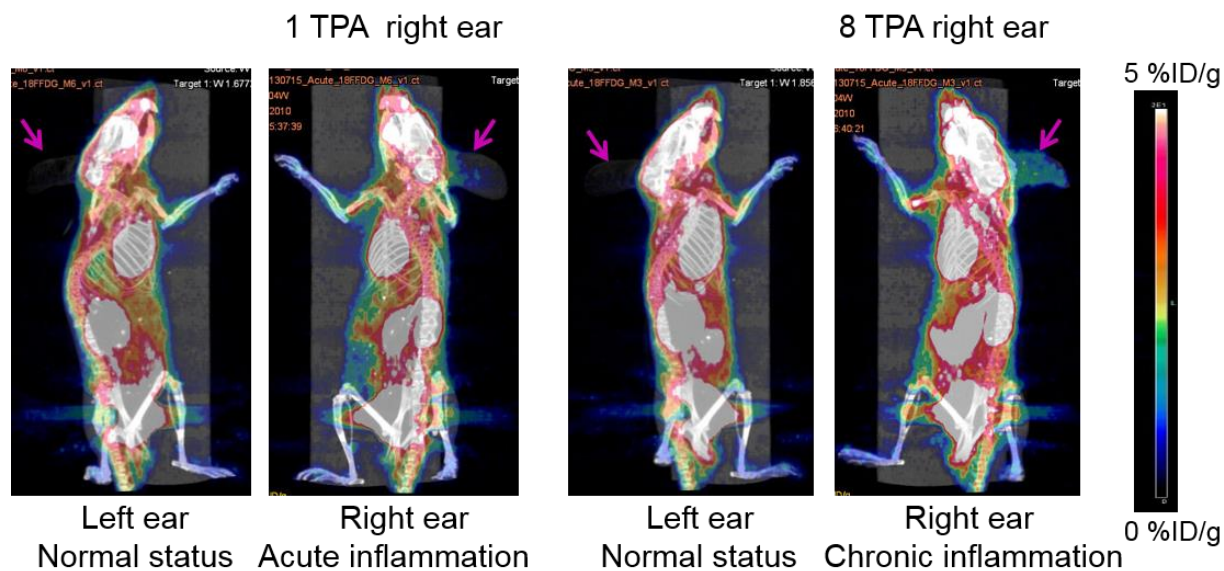

**Supplemental Figure 7.  $^{18}\text{F}$ -FDG  $\mu\text{PET}/\text{CT}$  in BALB/c mice with TPA-induced acute and chronic ear inflammation.** Images were presented at a color scale (0 – 5 %ID/g) different from that in Figure 3C (3 – 10 %ID/g) to highlight uptake of the radiotracer in the inflammation ear. Purple arrow: ear.



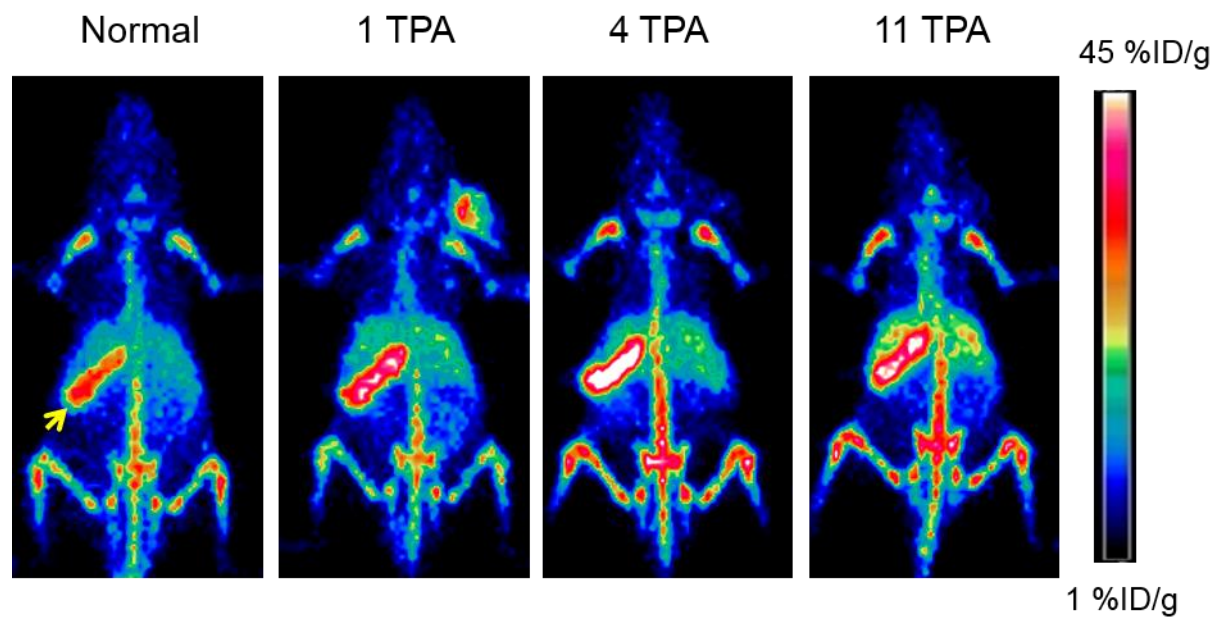

**Supplemental Figure 8.  $^{64}\text{Cu}$ - $\alpha\text{CD11b}$   $\mu\text{PET}/\text{CT}$  in BALB/c mice with TPA-induced acute and chronic ear inflammation.** Images were presented at a color scale (1 – 45 %ID/g) different from that in Figure 2 (1 – 20 %ID/g) to highlight changes in the spleen after different numbers of TPA challenges. Yellow arrow: spleen.

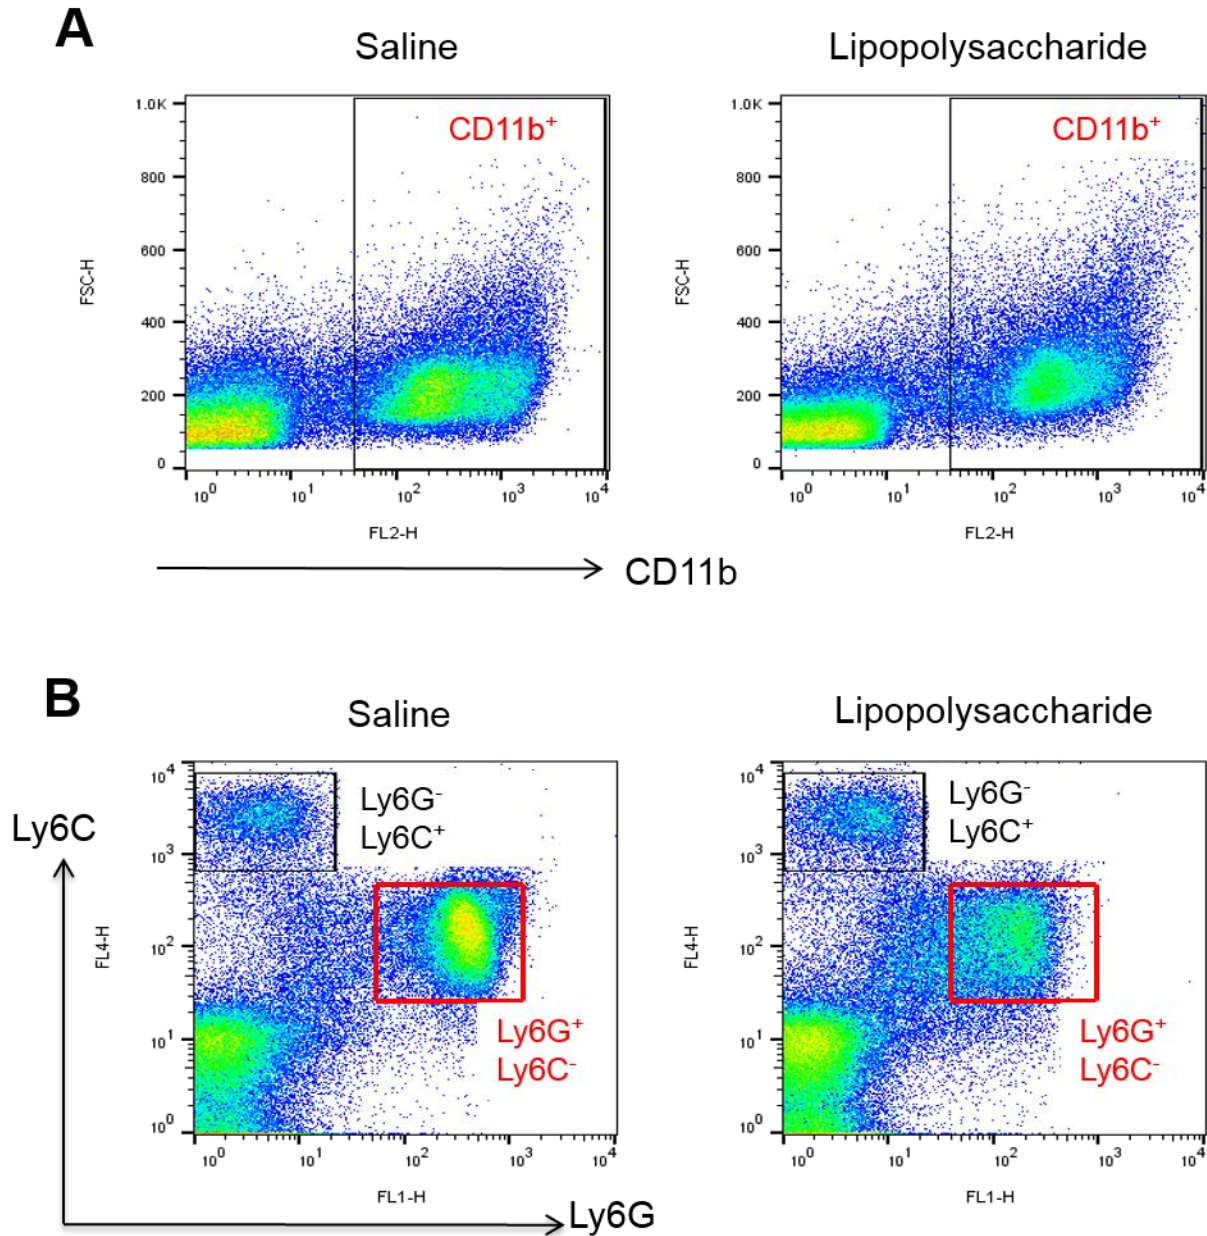

**Supplemental Figure 9. The representative flow cytometric dot plots showing bone marrow cells from normal mice and mice with acute lung inflammation.** Bone marrow cell samples were analyzed 24 h after intratracheal instillation of lipopolysaccharide. **(A)** Black grid: CD11b<sup>+</sup> cells. **(B)** Black grid: Ly6G<sup>-</sup>Ly6C<sup>+</sup> monocytic cells; red grid: Ly6G<sup>+</sup>Ly6C<sup>low</sup> granulocytic cells.
